# Supplementary material
Source: Springer Nature journal article supplement (https://www.springermedizin.de/resource/supplementary/12872_2013_669_MOESM1_ESM.pdf/9430462)

# Heart Failure Hospitalizations and Diary-Recorded Adherence

Adjusted

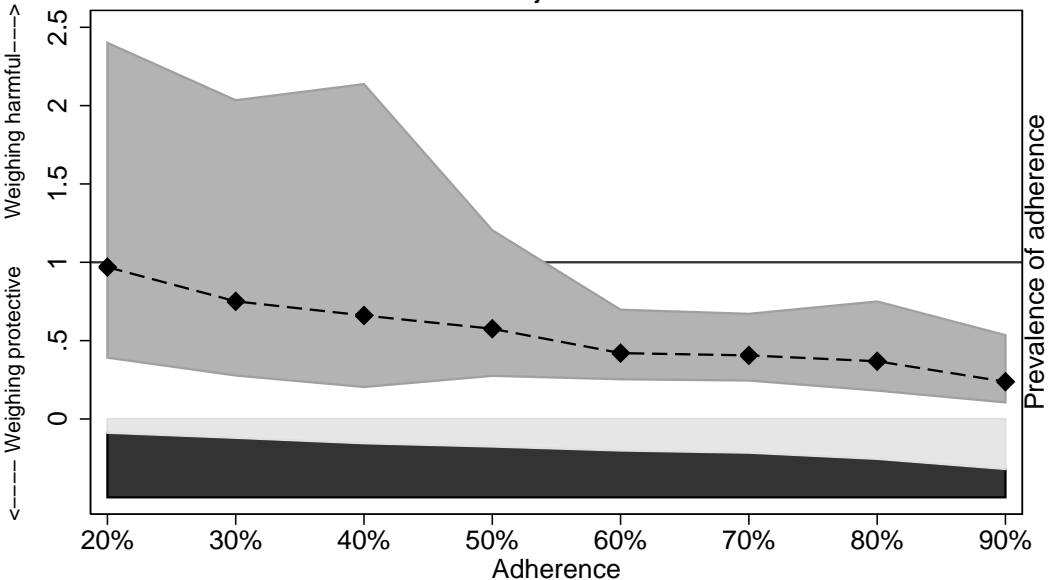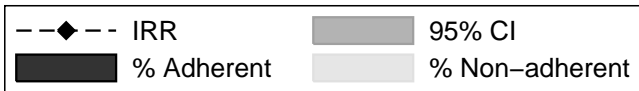

Supplement: MOESM1 [file 9430462]
